# Supplementary material for: Highly stretchable, bionic self-healing waterborne polyurethane elastic film enabled by multiple hydrogen bonds for flexible strain sensors
Source: Royal Society of Chemistry journal article supplement (doi:10.1039/d1ta05148b), 2021-01-01
Supplement: d1ta05148b1.pdf [file d1ta05148b1.pdf]

## Electronic Supplementary Information (ESI)

### **High stretchable, bionic self-healing waterborne polyurethane elastic film enabled by multiple hydrogen bonding for flexible strain sensors**

Ending Zhang <sup>a, b</sup>, Xiaohong Liu <sup>a, b</sup>, Yingchun Liu <sup>a, b</sup>, Jun Shi <sup>a, b, f, \*</sup>, Xiaobin Li <sup>a, b</sup>,  
Xiaoyan Xiong <sup>a, b</sup>, Changan Xu <sup>a, b, c</sup>, Kun Wu <sup>a, b, e</sup>, Mangeng Lu <sup>a, b, d</sup>

<sup>a</sup> *Guangzhou Institute of Chemistry, Chinese Academy of Sciences, Guangzhou 510650, People's Republic of China.*

<sup>b</sup> *University of Chinese Academy of Sciences, Beijing 10049, People's Republic of China.*

<sup>c</sup> *CAS Engineering laboratory for Special Fine Chemicals, Guangzhou 510650, People's Republic of China.*

<sup>d</sup> *Guangdong Provincial Key Laboratory of Organic Polymer Materials for Electronics, Guangzhou 510650, People's Republic of China.*

<sup>e</sup> *CASH GCC Shaoguan Research Institute of Advanced Materials.*

<sup>f</sup> *New Materials Research Institute of CASCHEM (Chongqing) Co., Ltd, Chongqing, 400714, People's Republic of China.*

---

\*Corresponding author, E-mail address: junshi@gic.ac.cn (Jun Shi).

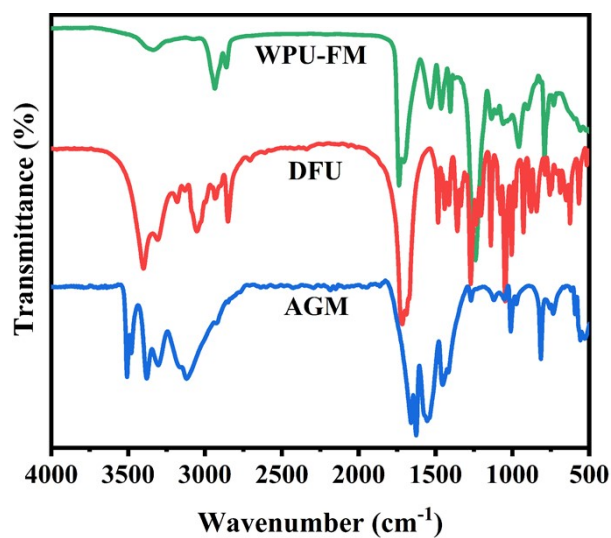

Figure S1. FTIR spectra of WPU-FM, DFU and AGM.

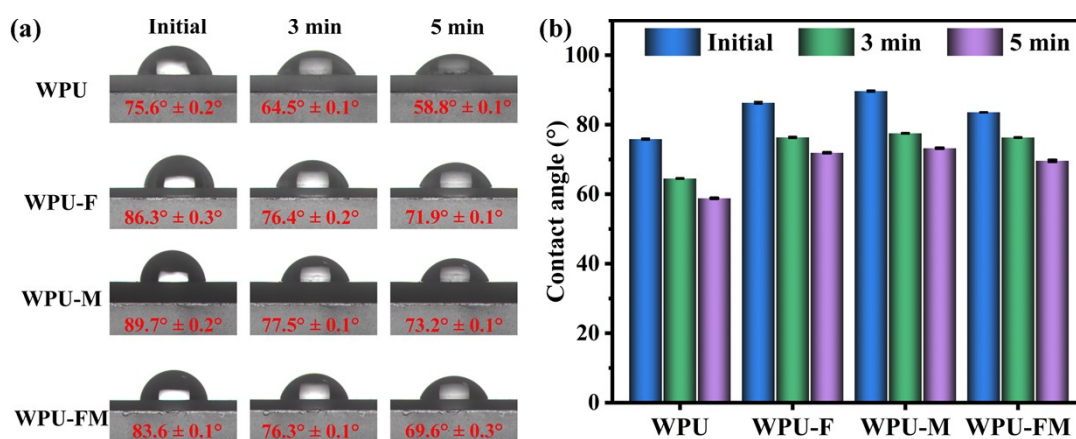

Figure S2. Images (a) and data bar charts (b) of contact angle of WPU, WPU-F, WPU-M, WPU-FM films in different periods.

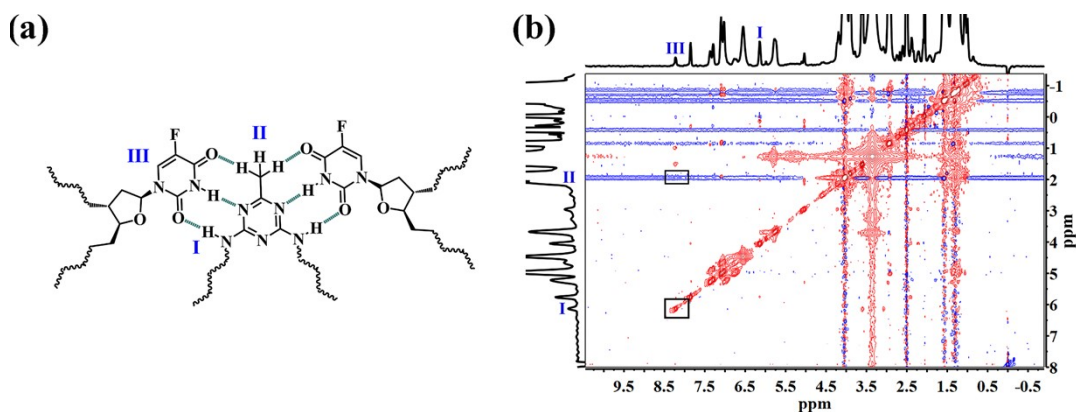

Figure S3. Theoretical structure model of six-fold hydrogen bonds (a), NOESY NMR spectrum of WPU-FM sample (b).

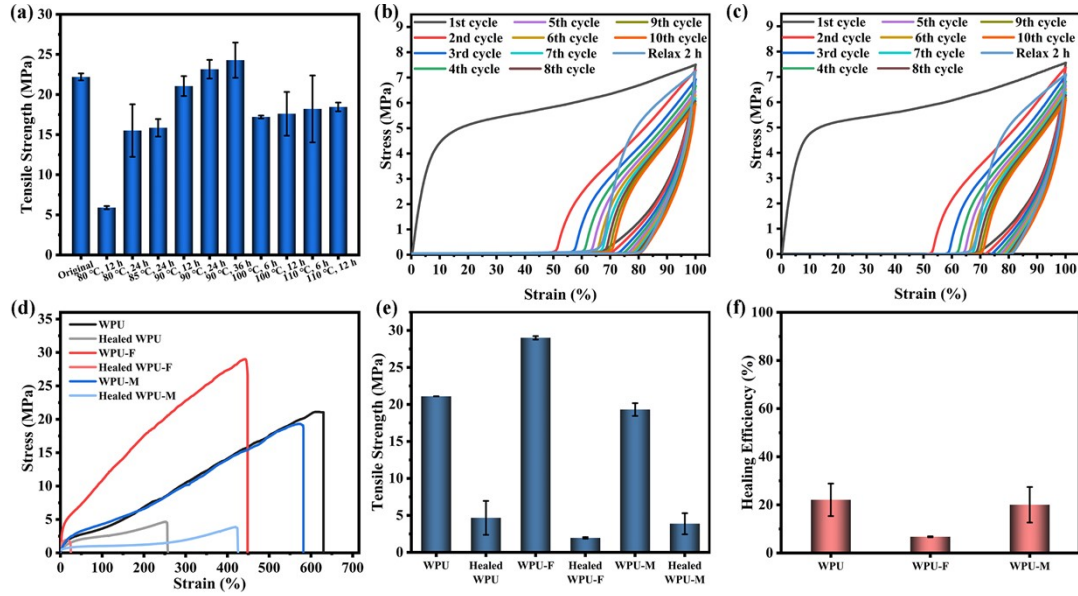

**Figure S4.** Tensile strength of WPU-FM sample healed under various conditions (a). The cyclic tensile curves of WPU-FM film healed at 90 °C for 12 h (b), and of the original sample (c), when the strain was 100%. The mechanical properties (d-e) and healing efficiency (f) of WPU, WPU-F and WPU-M film healed at 90 °C for 12 h.

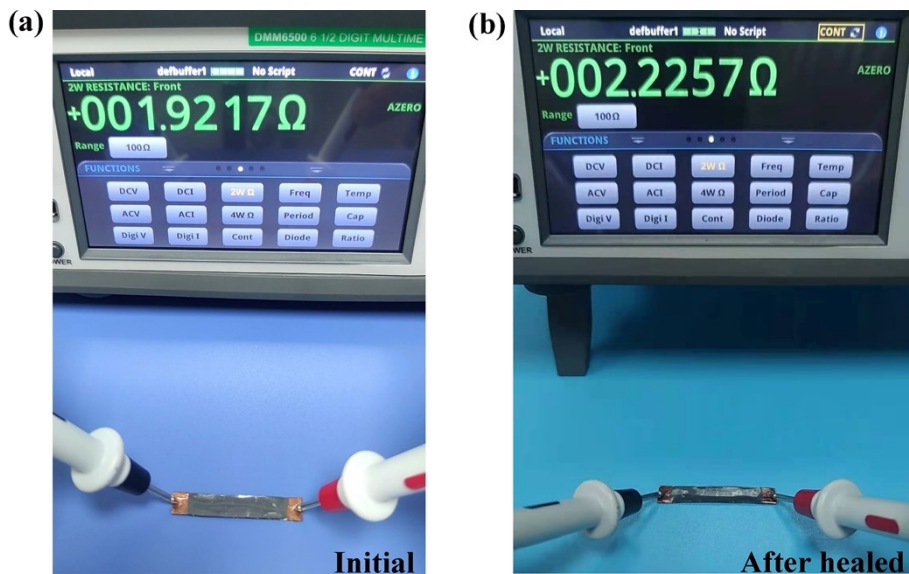

**Figure S5.** The resistance value ( $R$ ) of the initial WPU-FM/LM (a) and the healed WPU-FM/LM (b).

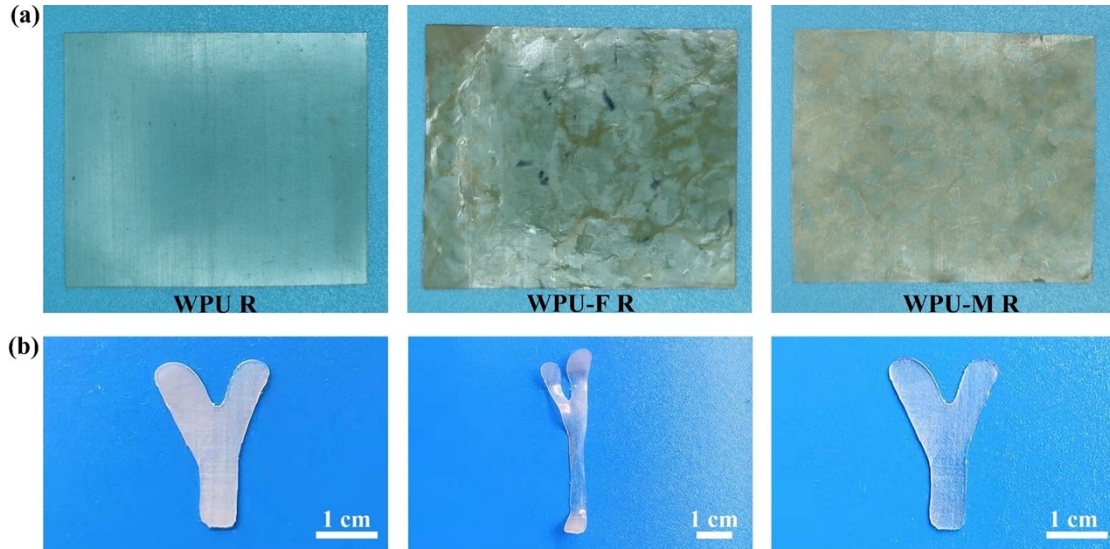

Figure S6. Photographs of WPU R, WPU-F R and WPU-M R film after secondary processing (a).

Demonstration of shape memory performance of "Y" shape WPU-FM film (b).

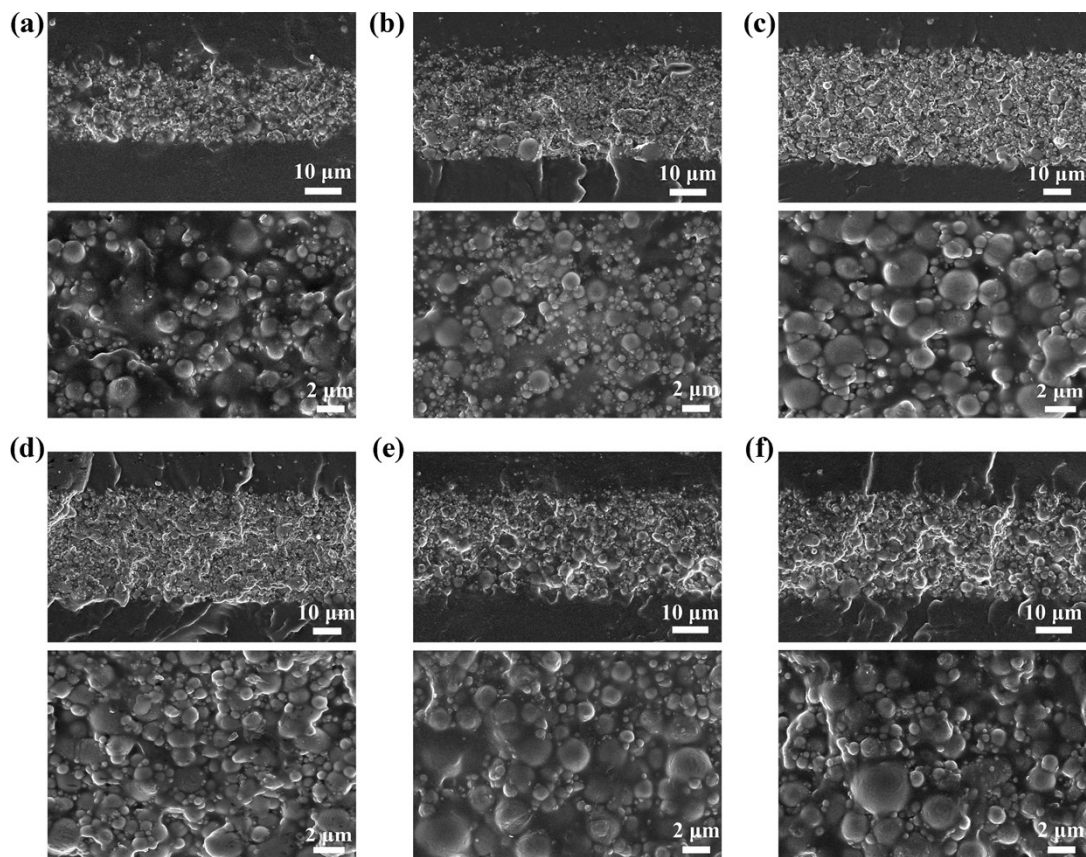

Figure S7. SEM images of the cross-sectional morphology of WPU-FM/LM composite films (LM:

25 wt.% (a), 30 wt.% (b), 35 wt.% (c), 40 wt.% (d), 45 wt.% (e) and 50 wt.% (f).).

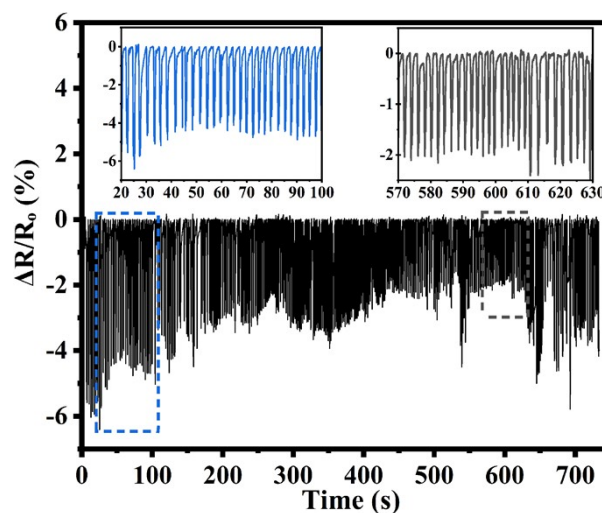

Figure S8.  $\Delta R/R_0$  vs time of right index finger bend 365 times.

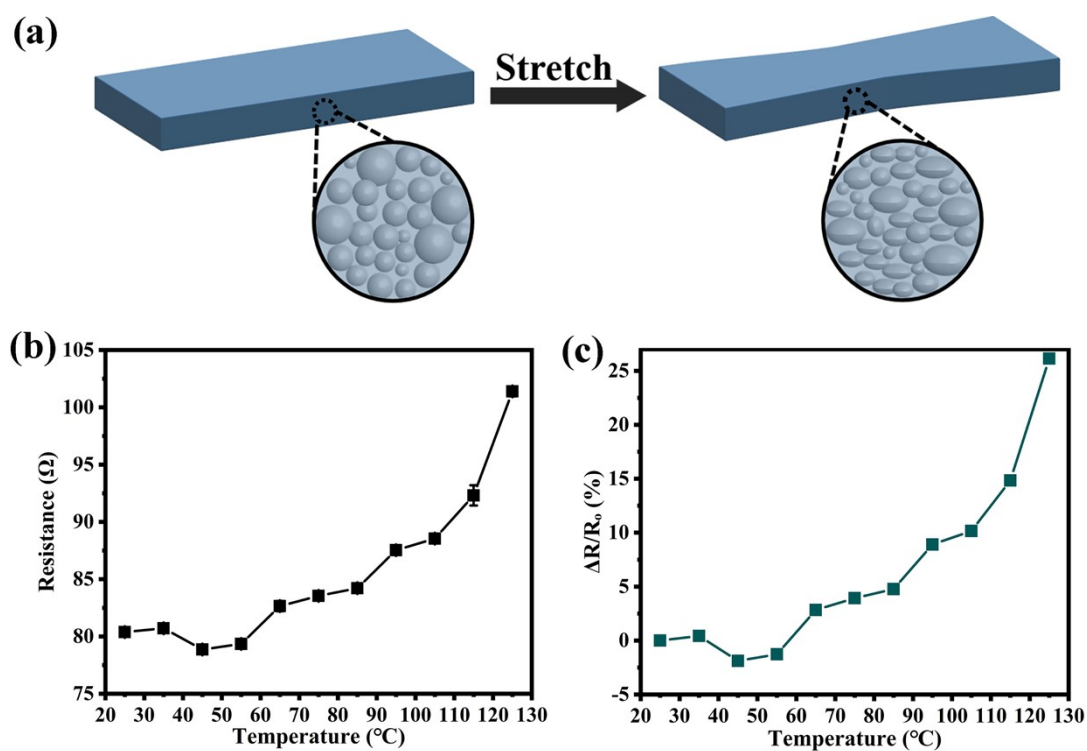

Figure S9. Schematic of the arrangement and shape change of LM micro-droplet particles in WPU-FM/LM composite film during stretching (a). Resistances (b) and relative resistance changes (c) of WPU-FM/LM 0.45 under different temperatures.

**Table S1.** Elemental composition of the samples.

| Sample | Atomic (wt. %) |      |       |
|--------|----------------|------|-------|
|        | C              | N    | O     |
| WPU    | 69.31          | 2.17 | 28.52 |
| WPU-F  | 72.75          | 2.05 | 25.20 |
| WPU-M  | 67.75          | 2.11 | 30.14 |
| WPU-FM | 72.73          | 1.93 | 25.34 |

**Table S2.** The healing efficiency of WPU-FM film under different conditions.

| WPU-FM |      | Self-healing efficiency | Tensile strength | Elongation at break |
|--------|------|-------------------------|------------------|---------------------|
|        |      | (%)                     | (MPa)            | (%)                 |
| 80 °C  | 12 h | 27.94                   | 5.89             | 22.65               |
|        | 24 h | 73.50                   | 15.50            | 182.00              |
| 85 °C  | 24 h | 71.41                   | 18.85            | 451.72              |
|        | 12 h | 99.78                   | 21.05            | 348.87              |
| 90 °C  | 24 h | 104.32                  | 23.15            | 360.04              |
|        | 36 h | 109.43                  | 24.28            | 353.00              |
| 100 °C | 6 h  | 77.51                   | 17.20            | 326.67              |
|        | 12 h | 79.28                   | 17.59            | 342.50              |
| 110 °C | 6 h  | 82.03                   | 18.20            | 360.00              |
|        | 12 h | 83.13                   | 18.45            | 393.33              |
